# Supplementary material
Source: HighWire-hosted journal article supplement (http://www.jrheum.org/highwire/filestream/29788/field_highwire_adjunct_files/0/151009_Data_Suppl.pdf)
Supplement: 151009_Data_Suppl.pdf [file 151009_Data_Suppl.pdf]

**Supplementary Figure 1.** Secondary efficacy outcomes over time.

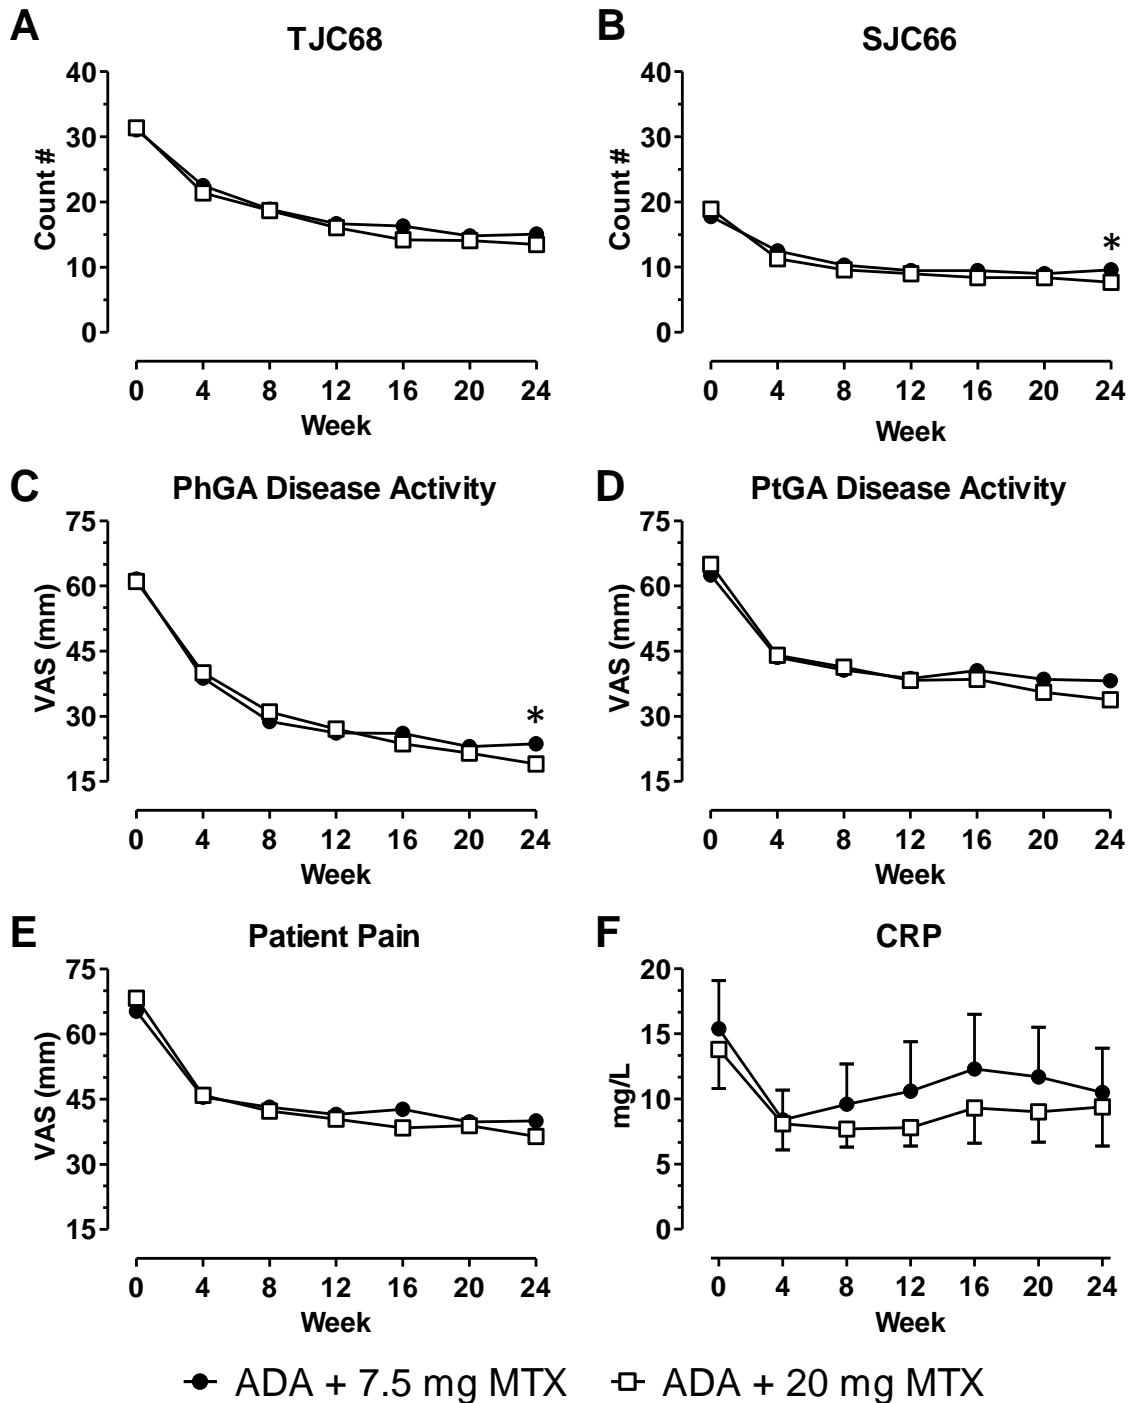

ADA: adalimumab; MTX: methotrexate; CRP: C-reactive protein; TJC: tender joint count; SJC: swollen joint count; PhGA: physician's global assessment; PtGA: patient's global assessment; VAS: visual analog scale.

**Supplementary Figure 2.** Comparison between patients who had a smaller reduction in MTX and those who experienced a larger reduction in MTX.

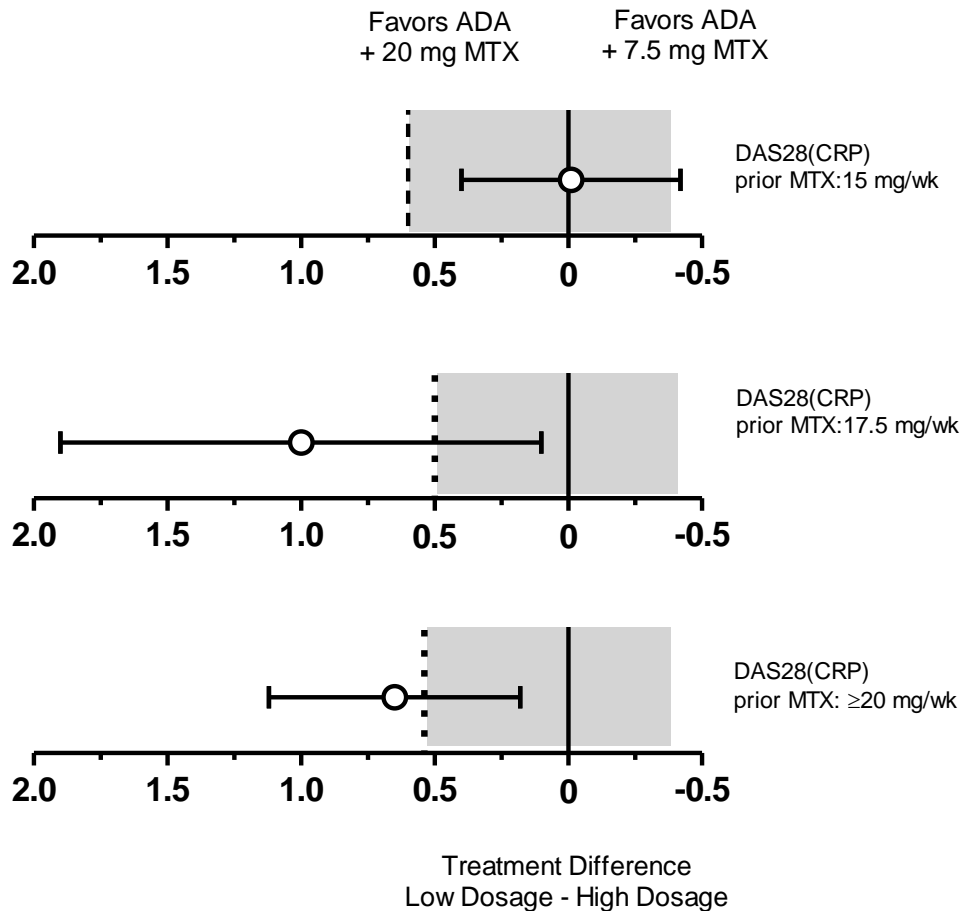

ADA: adalimumab; MTX: methotrexate; DAS28(CRP): 28-joint Disease Activity Score by C-reactive protein.
